# Supplementary material for: NN-RNALoc: Neural network-based model for prediction of mRNA sub-cellular localization using distance-based sub-sequence profiles
Source: PubMed Central journal article supplement (PMC10501558; doi:10.1371/journal.pone.0258793), 2023-09-14
Supplement: pone.0258793.s001.pdf [file pone.0258793.s001.pdf]

**S1 Table: Results of 30 times 10-fold cross-validation of NN-RNALoc (with and without employing PPI information) compared with RNATracker(fixed length mode) and mRNALoc on the human part of RNALocate dataset.**

| Methods          | NN-RNALoc   |             |             |      |      | NN-RNALoc(noPPI) |      |      |      |             | RNATracker |      |      |      |      | mRNALoc |      |      |      |             |
|------------------|-------------|-------------|-------------|------|------|------------------|------|------|------|-------------|------------|------|------|------|------|---------|------|------|------|-------------|
|                  | Cyt         | ER          | EX          | Mit  | Nuc  | Cyt              | ER   | EX   | Mit  | Nuc         | Cyt        | ER   | EX   | Mit  | Nuc  | Cyt     | ER   | EX   | Mit  | Nuc         |
| Precision        | <b>0.74</b> | <b>0.56</b> | <b>0.91</b> | 0.00 | 0.52 | 0.65             | 0.40 | 0.00 | 0.00 | <b>0.61</b> | 0.66       | 0.52 | 0.00 | 0.00 | 0.49 | 0.74    | 0.46 | 0.00 | 0.00 | 0.52        |
| Recall           | 0.72        | <b>0.48</b> | <b>0.04</b> | 0.00 | 0.70 | <b>0.84</b>      | 0.14 | 0.00 | 0.00 | 0.51        | 0.59       | 0.06 | 0.00 | 0.00 | 0.54 | 0.61    | 0.50 | 0.00 | 0.00 | <b>0.72</b> |
| F-score          | <b>0.74</b> | <b>0.52</b> | <b>0.07</b> | 0.00 | 0.60 | 0.73             | 0.21 | 0.00 | 0.00 | 0.56        | 0.73       | 0.11 | 0.00 | 0.00 | 0.53 | 0.67    | 0.48 | 0.00 | 0.00 | <b>0.61</b> |
| Average Accuracy | <b>0.65</b> |             |             |      |      | 0.63             |      |      |      |             | 0.63       |      |      |      |      | 0.61    |      |      |      |             |
| Average MCC      | <b>0.40</b> |             |             |      |      | 0.30             |      |      |      |             | 0.34       |      |      |      |      | 0.37    |      |      |      |             |

The names of compartments are abbreviated as Cyt : Cytosol, ER: Endoplasmic Reticulum, EX : Extracellular Region, Mit :Mitochondria, Nuc: Nucleus.
