# Supplementary material for: NN-RNALoc: Neural network-based model for prediction of mRNA sub-cellular localization using distance-based sub-sequence profiles
Source: PubMed Central journal article supplement (PMC10501558; doi:10.1371/journal.pone.0258793), 2023-09-14
Supplement: pone.0258793.s002.pdf [file pone.0258793.s002.pdf]

**S2 Table: Results of AUC-ROC (ROC) and AUC-PR (PR) for each location of human part of RNALocate database obtained by NN-RNALoc, SVM-RNALoc, RF-RNALoc, XGBoost-RNALoc, DNN-RNALoc, LightGBM-RNALoc.**

| Methods | NN-RNALoc   |             | SVM-RNALoc |      | RF-RNALoc |      | XGBoost-RNALoc |      | LightGBM-RNALoc |      |
|---------|-------------|-------------|------------|------|-----------|------|----------------|------|-----------------|------|
|         | ROC         | PR          | ROC        | PR   | ROC       | PR   | ROC            | PR   | ROC             | PR   |
| Cyt     | <b>0.76</b> | <b>0.66</b> | 0.65       | 0.58 | 0.65      | 0.55 | 0.66           | 0.28 | 0.45            | 0.28 |
| ER      | <b>0.70</b> | <b>0.79</b> | 0.23       | 0.31 | 0.55      | 0.40 | 0.34           | 0.42 | 0.44            | 0.38 |
| EX      | <b>0.65</b> | <b>0.63</b> | 0.00       | 0.00 | 0.00      | 0.00 | 0.00           | 0.00 | 0.00            | 0.00 |
| Mit     | 0.00        | 0.00        | 0.00       | 0.00 | 0.00      | 0.00 | 0.00           | 0.00 | 0.00            | 0.00 |
| Nuc     | <b>0.71</b> | <b>0.70</b> | 0.34       | 0.50 | 0.25      | 0.40 | 0.33           | 0.45 | 0.48            | 0.38 |

The names of compartments are abbreviated as Cyt : Cytosol, ER: Endoplasmic Reticulum, EX : Extracellular Region, Mit :Mitochondria, Nuc: Nucleus. NN-RNALoc (with employing NN on k-mer and distance-based profiles features); SVM-RNALoc (with employing support vector machine on k-mer and distance-based profiles features); XGBoost-RNALoc(with employing extreme gradient boosting on k-mer and distance-based profiles features); LightGBM-RNALoc (with employing light gradient-boosting machine on k-mer and distance-based profiles features).
